# Supplementary material for: A new zebrafish model produced by TILLING of SOD1-related amyotrophic lateral sclerosis replicates key features of the disease and represents a tool for in vivo therapeutic screening
Source: PubMed Central journal article supplement (PMC3882050; doi:10.1242/dmm.012013), 2013-10-02
Supplement: supp_012013_DMM012013.pdf [file supp_012013_DMM012013.pdf]

| Score         | Expect | Method                             | Identities                                                      | Positives    | Gaps      |
|---------------|--------|------------------------------------|-----------------------------------------------------------------|--------------|-----------|
| 218 bits(556) | 1e-77  | Compositional matrix adjust.       | 108/154(70%)                                                    | 118/154(76%) | 0/154(0%) |
| Zebrafish 1   |        | MVNKAVCVLKG                        | TGVTGTVYFNQEGEKKPVKVTGEITGLTPGKKGPHVHAFGDNTNGCIS                | 60           |           |
| Human 1       |        | M KAVCVLEK G V G + F Q+            | PVEV G I GLT G HGFHVEH PGDNT GC S                               | 60           |           |
| Zebrafish 61  |        | AGPHFNP                            | HDKTHGGPTDSVRHVGD LGNVTADASGVAKIEIEDAMLTLSGGQHSIIIGRTMVI        | 120          |           |
| Human 61      |        | AGPHFNP + HGGP D                   | RHVGD LGNVTAD GVA + IED++++LSG H IIGRT+V+                       | 120          |           |
|               |        |                                    | AGPHFNP LSRKHGGPKDEERHVGD LGNVTADKDG VADVSIEDSVISLSGDHCIIGRTLIV | 120          |           |
|               |        |                                    | R65S G72S/C R80R                                                |              |           |
|               |        |                                    | L67R D76Y/V                                                     |              |           |
|               |        |                                    | Zinc binding loop                                               |              |           |
| Zebrafish 121 |        | HEKEDDLGKGGNEESLKTGNAGGRLACGVIGITQ | 154                                                             |              |           |
| Human 121     |        | HEKDDLKGGNEES KTG NAG RLACGVIGI Q  | 154                                                             |              |           |

Supplementary Fig. 1. A Blast P of zebrafish and human SOD1, annotated to show the location of the T70I mutation in zebrafish Sod1 (in blue), and also the location of disease causing mutations in the zinc binding loop of human SOD1 (in red).
